# Supplementary material for: Beyond Survival: A Cross-Sectional Analysis of Guideline Recommendations for Cognitive, Sexual, and Psychological Problems in Cancer Survivors
Source: Research Square preprint supplement (doi:10.21203/rs.3.rs-7235753/v1), 2025-09-01
Supplement: Supplementary file 1 [file 22a629d8fb2204cbcc6339d5.docx]

**Rating according to AGREE II criteria**

Rating of stars : 1-3 = *, 4-5 = **,6-7 = ***

This assessment provided an overall evaluation as well as a detailed analysis across six domains, comprising 23 individual items: scope and purpose (3 items), stakeholder involvement (3 items), rigor of development (8 items), clarity of presentation (3 items), applicability (4 items), and editorial independence (2 items). Each item was scored on a 3 star (***) scale, with 1 star indicating "not adhered to" (1-3 points), 2 star “moderately adhered” (4-5 points) to and 3 indicating "fully adhered." (6-7 points). To summarize overall quality, we applied the following classification criteria: High quality: Guidelines receiving 3 stars in at least 5 of the 6 domains (i.e., >15 total stars). Moderate quality: Guidelines receiving an average of 2 stars across domains (i.e., ~12–15 total stars), including occasional domains rated as 1 star. Low quality: Guidelines with <12 total stars or multiple domains rated as 1 star. See supplementary file for detailed assessment of each domain

**Evaluation**

**1. K. L. Campbell, K. M. Winters-Stone, J. Wiskemann, A. M. May , A. L. Schwartz, K. S. Courneya, D. S. Zucker, C. E. MAthews , J. A. Ligibel, L. H. Gerber, S. G. Morris, A. V. Patal, T. F. Hue, F. M. Perna and K. H. Schmitz, “Exercise Guidelines for Cancer Survivors: Consensus Statement from International Multidisciplinary Roundtable,” Med Sci Sports Exerc, vol. 51, no. 11, pp. 2375-2390, 2019.**

1. Scope and Purpose (Items 1–3).

Objective: The guideline clearly addresses improving the health of cancer survivors through exercise. The objectives are well defined in terms of managing specific health outcomes related to cancer treatments.

Health Questions: The guideline answers specific questions about the efficacy of exercise in improving cancer-related outcomes

Target Population: The target population is clearly defined, focusing on adult cancer survivors across different cancer types and stages.

Score: 7/7

2. Stakeholder Involvement (Items 4–6)

Group Composition: It involves a diverse international multidisciplinary team, including oncologists, exercise scientists, and rehabilitation experts.

Target Users: The guideline is aimed at healthcare professionals such as clinicians, physical therapists, and exercise specialists.

Patient Involvement: There is little to no explicit mention of direct patient involvement in shaping the guidelines.

Score: 5/7. The guideline is strong in including a wide range of professional experts, but it lacks details on the involvement of patient representatives in the development process.

3. Rigor of Development (Items 7–14)

Systematic Methods: The guideline follows a systematic review process, analyzing randomized controlled trials, systematic reviews, and meta-analyses from reliable databases (Medline,Cochrane,etc.)

Evidence Selection: Clear inclusion and exclusion criteria are used to select relevant studies. The guideline acknowledges areas with insufficient evidence.

Formulation of Recommendations: Evidence-based exercise prescriptions are provided for specific outcomes, following the FITT (Frequency, Intensity, Time, Type) principle.

External Review: The guidelines underwent review from professional organizations, but there is no detailed mention of a broad public consultation process.

Updating: There is no explicit mention of plans to regularly update the guidelines, but it is inferred that the guideline will be reviewed as new evidence emerges.

Score: 5/7 - The guideline demonstrates a strong commitment to evidence based methodology but could be improved with more clarity on external review and plans for updating.

4. Clarity of Presentation (Items 15–17)

Recommendations: The exercise prescriptions are clear and easy to follow, with well-structured FITT recommendations for various cancer-related health outcomes (e.g fatigue, anxiety, and physical function)

Presentation: The document is organized systematically with tables and summaries for each key outcome. It is easy to navigate and apply in practice.

Identifiable Key Recommendations: Key recommendations are clearly identifiable and structured according to health outcomes.

Score: 7/7

5. Applicability (Items 18–21)

Facilitators and Barriers: The guideline acknowledges some barriers, such as the availability of resources like supervised exercise programs, but it lacks comprehensive discussion on overcoming these barriers

Tools for Application: There are clear, detailed exercise prescriptions (FITT) for clinicians, but no concrete tools like flowcharts or checklists to assist in the clinical setting.

Resource Implications: The guideline provides little information on cost or resource implications for implementation, particularly in different healthcare systems.

Monitoring and Auditing: No clear mention of how the application of the guideline should be monitored or audited.

Clinicians treating survivors of rarer or advanced-stage cancers may find that the recommendations are less applicable to their patient populations due to the lack of tailored guidance for those specific cancers. The assumption that the evidence from breast and prostate cancer can be generalized may not always hold true in practice, particularly for patients with more complex conditions (e.g., metastatic cancers).

Score: 3/7. While the recommendations are clear, the guideline falls short in discussing practical implementation strategies and providing resources like monitoring tools.

6. Editorial Independence (Items 22–23)

Funding Sources: The guideline is developed by a multidisciplinary roundtable and no specific conflicts of interest from commercial sponsors are noted.

Competing Interests: While there is some mention of competing interests in the development of the guideline, this could be more transparent how those competing interests were managed, mitigated, or whether they influenced the recommendations. Score: 5/7

Overall Quality Rating: 5.3/7

**2. C. D. Runowicz, C. R. Leach, L. N. Henry, K. S. Henry, H. T. Mackey, R. Cowens-Alvarado, R. S. Cannady, M. L. Pratt-Chapman, S. B. Edge, L. A. Jacobs, A. Hurria, L. B. Marks, S. J. LaMonte, E. Warner, G. H. Lyman and P. A. Ganz, “American Cancer Society/American Society of Clinical Oncology Breast Cancer Survivorship Care Guideline,” CA Cancer J Clin, vol. 66, no. 1, pp. 43-73, 2016.**

1. Scope and Purpose

Overall Objectives: The guideline aims to provide recommendations for the care of female adult breast cancer survivors, focusing on areas such as cancer surveillance, management of long-term and late effects, and health promotion.

Health Questions: The clinical focus is clearly articulated with specific areas, such as managing recurrence and screening for new primary cancers. However, it could benefit from more explicit mention of measurable health outcomes related to survivorship

Target Population: The guideline clearly defines the target population as female breast cancer survivors, primarily focusing on post-treatment care.

Grade: 7/7

2. Stakeholder Involvement

Group Composition: A multidisciplinary panel including oncologists, primary care physicians, and nurses was involved in the development. However, there is no detailed explanation of how input from patients or caregivers was incorporated.

Target Users: The primary care providers and specialists (oncologists, radiation oncologists, etc.) who are the intended users are well identified.

Patient Involvement: The involvement of a patient representative is acknowledged

Grade: 7/7

3. Rigor of Development

Systematic Methods: The methodology of the systematic review is well-documented. A comprehensive literature search was conducted using PubMed, and over 1000 articles were screened. The level of evidence supporting recommendations is clearly reported.

Formulation of Recommendations: While the recommendations are based on a systematic review, most evidence is lower in quality (i.e., expert opinion, case-control studies). The guideline acknowledges the lack of strong evidence in certain areas. However, there is limited transparency on how expert consensus was managed when evidence was insufficient.

Updates: The guideline includes a clear statement on updates, specifying regular reviews every 5 years.

Grade: 5/7 More transparency in handling evidence gaps and potential bias from expert opinions would improve rigor of development

4. Clarity of Presentation

Recommendations: The recommendations are clear and supported by evidence.

Presentation: The document is organized systematically with tables and summaries for each key outcome. It is easy to navigate and apply in practice.

Identifiable Key Recommendations: The recommendations are well-organized and easily identifiable within the document.

Score: 7/7.

5. Applicability

Facilitation of Use: The guideline provides some practical recommendations, but it lacks concrete tools for implementation, such as decision aids, algorithms, or strategies to address resource constraints.

Barriers and Costs: The guideline does not adequately address potential barriers to implementation, such as resource availability, healthcare infrastructure, or cost implications for primary care providers. For instance, managing long term side effects, like lymphedema or cognitive impairment, may require resources or specialist referrals that are not accessible in all settings. Furthermore, there is no discussion of the financial burden of certain recommended interventions on either healthcare systems or patients, which is a significant gap.

Implementation Tools: The guideline does not provide supplementary tools such as checklists, care pathways, or decision aids that could support its use in clinical practice. These tools are especially important for primary care providers who may not be as familiar with the challenges of cancer survivorship care.

Monitoring and Audit: There is no mention of how healthcare providers could monitor adherence to the guidelines or audit their application in practice, which is a key aspect of ensuring their effectiveness in real-world settings.

Grade: 3/7 While the recommendations are practical, the guideline lacks essential tools and discussion on implementation barriers, costs, and monitoring.

6. Editorial Independence

Disclosure of Conflicts of Interest: The guideline includes detailed disclosures of conflicts of interest (COI) for all contributors. It specifies that no industry funding was used to support the work, ensuring independence from commercial influence.

Funding Influence: The guideline explicitly states that no commercial entities influenced its content, and it is funded by public health organizations like the Centers for Disease Control and Prevention (CDC), which adds to its credibility.

Grade: 6/7

Final Grade: 5.5/7

**3. Sanft T, Day AT, Goldman M, Ansbaugh S, Armenian S, Baker KS, Ballinger TJ, Demark-Wahnefried W, Fairman NP, Feliciano J, Flores TF, Friedman DL, Gabel N, Hill-Kayser C, Koura D, Lee K, Lee N, McDonough AL, Melisko M, Mooney K, Moore HCF, Moryl N, Neuman H, Overholser L, Patel C, Peterson L, Pirl W, Porpiglia A, Schapira L, Schwartz A, Smith S, Tevaarwerk A, Von Ah D, Wake R, Yang E, Zee P, McMillian N und Freedman-Cass D., „NCCN Guidelines® Insights: Survivorship, Version 2.2024,“ J Natl Compr Canc Netw, Bd. 22, Nr. 10, pp. 648-658, 2024**.

1. Scope and Purpose

Objectives: The guideline articulates its goal to provide a structured approach to survivorship care after curative cancer treatment. It addresses issues like recurrence monitoring, management of late/long-term effects, health promotion, and coordination of care.

Health Questions Addressed: It covers questions related to late effects faced by cancer survivors.

Target Population: Clearly identifies cancer survivors

Rating: 7/7

2. Stakeholder Involvement

Involvement of Professionals: A multidisciplinary team is evident, including oncologists, nurses, psychologists, and possibly primary care representation.

Patient Involvement: No explicit mention of survivor representatives in development or review.

Target Users Defined: Aimed at a wide audience oncologists, PCPs, nurses, survivorship care providers.

Rating: 5/7 No direct patient representation noted.

3. Rigor of Development

Evidence Collection: The recommendations cite existing guidelines (e.g., ASCO, ESMO, NCCN) and literature but do not provide detailed methodology for how evidence was searched, selected, or appraised or search strategy.

Recommendation Development: Mostly consensus-driven. Lacks a detailed grading system in the guideline

Updates: No available.in the guideline

Rating: 4/7 Evidence-informed but not methodologically rigorous.

4. Clarity of Presentation

Recommendations:: Well-organized, clearly written. Divided into sections: screening, pharmacological and non pharmacological treatment, etc.

Presentation : The document is organized systematically with tables and summaries for each key outcome. It is easy to navigate and apply in practice.

Key Recommendations: Clearly stated and easy to identify.

Rating: 7/7

5. Applicability

Implementation Tools: Lacks concrete tools like checklists, flowcharts, or templates for clinical use of the recommendation.

Resource and costs: Little discussion on how resource limitations, system capacity, or economic factors may affect implementation of intervention.

Monitoring: There is no specific mention of how the guideline’s implementation could be monitored or audited.

Rating: 5/7 Important content, but lacking in practical tools and implementation guidance.

6. Editorial Independence

Funding/Conflict of Interest: It provides a standard statement regarding panel composition and disclosures. Competing interests are listed on the NCCN website, but the PDF version of the guideline does not include detailed COI declarations or specify how they were managed during development

Influence of Funding Bodies: There is no indication of commercial or external influence over the recommendations.

Rating: 7/7

Overall :5.8/7

**4. El-Shami K, Oeffinger KC, Erb NL, Willis A, Bretsch JK, Pratt-Chapman ML, Cannady RS, Wong SL, Rose J, Barbour AL, Stein KD, Sharpe KB, Brooks DD und Cowens-Alvarado RL, „American Cancer Society Colorectal Cancer Survivorship Care Guidelines,“ CA Cancer J Clin, Bd. 65, Nr. 6, pp. 428-455, 2015.**

Scope and Purpose

Clarity of Objectives: The guideline clearly aims to provide comprehensive, evidence-informed survivorship care for colorectal cancer survivors, including surveillance, health promotion, and care coordination.

Health Questions: It covers key aspects such as recurrence detection, secondary prevention, long-term effects, and psychosocial concerns.

Target Population: Clearly defined as adult survivors of colorectal cancer, post-treatment.

Rating: 7/7

2. Stakeholder Involvement

Multidisciplinary Development: The guideline involved experts in oncology, primary care, nursing, behavioral health, and survivorship.

Patient Involvement: Although it is patient-centered, there is no direct mention of patient representatives being involved in the development process.

Intended Users: Targeted at both oncology and primary care providers involved in survivorship care.

Rating: 5/7. The guideline is strong in including a wide range of professional experts, but it lacks details on the involvement of patient representatives in the development process.

3. Rigor of Development

Evidence Base: Systematic review of literature with references to evidence grading from various sources.

Recommendation Development: Developed using structured consensus from ACS and external experts.

Updates: No clear timeline for regular updates is described.

Rating: 5/7

4. Clarity of Presentation

Recommendations: The recommendations are clear and supported by evidence.

Presentation: The document is organized systematically with tables and summaries for each key outcome. It is easy to navigate and apply in practice.

Identifiable Key Recommendations: The recommendations are well-organized and easily identifiable within the document.

Score: 7/7. The recommendations are clearly presented and unambiguous.

5. Applicability

Facilitation of Use: The guideline identifies roles for oncology and primary care but lacks decision aids or implementation tools.

Barriers and Costs: Barriers to implementation such as communication gaps and care fragmentation are discussed. However, resource implications are not deeply explored.

Monitoring and Audit: No tools or strategies for monitoring adherence are provided.

Rating: 3/7

6. Editorial Independence

Conflict of Interest: Conflicts of interest are declared, and ACS maintains editorial independence.

Funding Influence: No apparent influence from funding bodies on content.

Rating: 6/7

Overall rating : 5.5/7

**5. Verdonck-de Leeuw I, Dawson C, Licitra L, Eriksen JG, Hosal S, Singer S, Laverty DP, Golusinski W, Machczynski P, Varges Gomes A, Girvalaki C, Simon C und Leemans CR, „European Head and Neck Society recommendations for head and neck cancer survivorship care.,“ Oral Oncology, Bd. 133, 2022.**

1. Scope and Purpose

Clarity of Objectives: The guideline clearly aims to provide structured survivorship care recommendations for individuals treated for head and neck cancer (HNC), focusing on physical, psychological, and social long-term needs.

Health Questions: It addresses multiple late effects such as swallowing difficulties, speech issues, fatigue, depression, dental problems, and return to work.

Target Population: Adult survivors of head and neck cancer following treatment.

Rating: 6/7

2. Stakeholder Involvement

Multidisciplinary Development: The panel included clinicians from across Europe, representing surgical oncology, medical oncology, psychology, rehabilitation, and public health.

Patient Involvement: No direct evidence of patient or caregiver involvement in the development process.

Intended Users: Intended for use by oncology providers, survivorship teams, and rehabilitation specialists.

Rating: 5/7 – Strong multidisciplinary input, but no patient representation.

3. Rigor of Development :

Evidence Base: Systematic review of literature with references to evidence grading from various sources.

Recommendation Development: Developed using structured consensus from ACS and external experts.

Updates: No clear timeline for regular updates is described.

Rating: 5/7

4. Clarity of Presentation

Recommendations: The recommendations are clear and supported by evidence.

Presentation: The document is organized systematically with tables and summaries for each key outcome. It is easy to navigate and apply in practice.

Identifiable Key Recommendations: The recommendations are well-organized and easily identifiable within the document.

Score: 7/7. The recommendations are clearly presented and unambiguous.

5. Applicability

Facilitation of Use: While the guideline gives practical advice, it lacks implementation tools such as algorithms or decision aids.

Barriers and Costs: There is little discussion of feasibility, workforce burden, or resource allocation across different health systems.

Monitoring and Audit: No mechanisms for follow-up, performance indicators, or audit strategies are proposed.

Rating: 3/7

6. Editorial Independence

Funding: No specific conflicts of interest from commercial sponsors are noted. Development of the recommendations was supported by the Make Sense campaign

Conflict of Interest: The authors declare that they have no known competing financial

interests or personal relationships that could have appeared to influence the work reported in this paper.

Suggested Score: 7/7. The guideline shows a high degree of editorial independence and transparency regarding conflicts of interest.

Overall rating : 5.5/7

**6. Cohen EE, LaMonte SJ, Erb NL, Beckman KL, Sadeghi N, Hutcheson KA, Stubblefield MD, Abbott D, Fisher PS, Stein KD, Lyman GH und Pratt-Chapman ML, „American Cancer Society Head and Neck Cancer Survivorship Care Guideline.,“ CA Cancer J Clin., Bd. 66, Nr. 3, pp. 203-239, 2016.**

1. Scope and Purpose

Clarity of Objectives: The guideline clearly aims to provide structured survivorship care for individuals treated for head and neck cancer (HNC), with emphasis on surveillance, late effects, health promotion, and care coordination.

Health Questions: It addresses recurrence, secondary cancers, dental care, psychosocial effects, and rehabilitation.

Target Population: Adult survivors of HNC after curative-intent treatment.

Rating: 7/7

2. Stakeholder Involvement

Multidisciplinary Development: Developed by a team including oncology, dental, psychosocial, and primary care experts.

Patient Involvement: While the guideline is patient-centered, there is no documentation of direct patient input in the development process.

Intended Users: Targeted at both oncologists and primary care providers managing survivorship care.

Rating: 5/7

3. Rigour of Development

Evidence Base: A comprehensive literature review was conducted with transparent inclusion criteria.

Recommendation Development: Based on structured consensus; includes citations and rationale for each recommendation.

Updates: No specific procedure or timeline for updating the guideline is mentioned.

Rating: 6/7

4. Clarity of Presentation

Recommendations: Clearly stated and actionable.

Presentation: Organized by domains of care (e.g., dental, psychosocial, speech/swallowing). Includes tables and summary boxes.

Identifiable Key Recommendations: Easily found and separated from background text.

Rating: 7/7

5. Applicability

Facilitation of Use: Practical summaries are included, but no flowcharts or implementation checklists.

Barriers and Costs: Barriers are discussed; resource implications are briefly mentioned.

Monitoring and Audit: No structured plan for monitoring or evaluation provided.

Rating: 4/7

6. Editorial Independence

Conflict of Interest: Conflicts of interest are declared, and ACS maintains editorial independence.

Funding Influence: No apparent influence from funding bodies on content.

Rating: 6/7

Overall rating : 5.8/7

7. **Leong K, Hartley J, Karandikar S. Association of Coloproctology of Great Britain & Ireland (ACPGBI): Guidelines for the Management of Cancer of the Colon, Rectum and Anus (2017) - Follow Up, Lifestyle and Survivorship. Colorectal Dis. 2017 Jul;19 Suppl 1:67-70.**

1. Scope and Purpose

Clarity of Objectives: The guideline clearly outlines its focus on follow-up, lifestyle, and survivorship after curative treatment for colorectal cancer.

Health Questions: It addresses recurrence detection, psychosocial support, audit, and survivorship improvement.

Target Population: Adult patients treated for colorectal cancer with curative intent.

Rating: 6/7

2. Stakeholder Involvement

Multidisciplinary Development: Authors include only colorectal surgeons.

Patient Involvement: No evidence of direct patient or public involvement in guideline development.

Intended Users: Primarily clinicians involved in colorectal cancer care and survivorship.

Rating: 3/7

3. Rigour of Development

Evidence Base: Recommendations are supported by multiple studies and meta-analyses, though methodology for evidence selection is not described in detail.

Recommendation Development: Clear linkage to evidence, but the process for formulating recommendations is not fully transparent.

Updating Procedure: No stated plan for updates or future review.

Rating: 4/7

4. Clarity of Presentation

Recommendations: Generally clear and structured by topic (e.g., surveillance, lifestyle, psychosocial support).

Presentation: Key recommendations are labelled with strength (Grade B–D) and are easy to find.

Identifiable Key Recommendations: Clearly distinguished in the text.

Rating: 4/7

5. Applicability

Facilitation of Use: Lacks tools (e.g., flowcharts or checklists) for implementation; however, pragmatic advice is embedded.

Barriers and Costs: Some acknowledgment of variability in local resources, but little discussion of cost or implementation barriers.

Monitoring and Audit: No clear audit criteria or monitoring framework is included.

Rating: 3/7

6. Editorial Independence

Conflict of Interest: Authors declare no conflicts of interest.

Funding Influence: Not mentioned

Rating: 7/7

Overall Quality Rating: 4.5/7

**8. C. D. Runowicz, C. R. Leach, L. N. Henry, K. S. Henry, H. T. Mackey, R. Cowens-Alvarado, R. S. Cannady, M. L. Pratt-Chapman, S. B. Edge, L. A. Jacobs, A. Hurria, L. B. Marks, S. J. LaMonte, E. Warner, G. H. Lyman und P. A. Ganz, „American Cancer Society/American Society of Clinical Oncology Breast Cancer Survivorship Care Guideline,“ CA Cancer J Clin, Bd. 66, Nr. 1, pp. 43-73, 2016.**

1. Scope and Purpose

Objectives: The guideline aims to provide recommendations for the care of female adult breast cancer survivors, focusing on areas such as cancer surveillance, management of long-term and late effects, and health promotion.

Health Questions: The clinical focus is clearly articulated with specific areas, such as managing recurrence and screening for new primary cancers. However, it could benefit from more explicit mention of measurable health outcomes related to survivorship

Target Population: The guideline clearly defines the target population as female breast cancer survivors, primarily focusing on post-treatment care.

Grade: 6/7

2. Stakeholder Involvement

Development Group: A multidisciplinary panel including oncologists, primary care physicians, and nurses was involved in the development. However, there is no detailed explanation of how input from patients or caregivers was incorporated.

Target Users: The primary care providers and specialists (oncologists, radiation oncologists, etc.) who are the intended users are well identified.

Patient Involvement: The involvement of a patient representative is acknowledged, but the degree to which patient perspectives influenced the final recommendations is unclear..

Grade: 6/7

3. Rigor of Development

Evidence Search and Selection: The methodology of the systematic review is well-documented. The level of evidence supporting recommendations is clearly reported.

Recommendation Development: While the recommendations are based on a systematic review, most evidence is lower in quality (i.e., expert opinion, case-control studies). The guideline acknowledges the lack of strong evidence in certain areas. However, there is limited transparency on how expert consensus was managed when evidence was insufficient.

Updates: The guideline includes a clear statement on updates, specifying regular reviews every 5 years.

Grade: 5/7

4. Clarity of Presentation

Language: The recommendations are written in clear, accessible language, suitable for primary care clinicians.

Format: The guideline is structured logically, with distinct sections on surveillance, health promotion, and psychosocial effects. Tables summarizing recommendations by clinical areas are easy to follow.

Actionability: The recommendations are generally actionable

Grade: 7/7

5. Applicability

Facilitation of Use: The guideline provides some practical recommendations, but it lacks concrete tools for implementation, such as decision aids, algorithms, or strategies to address resource constraints.

Barriers and Costs: The guideline does not in detail address potential barriers to implementation, such as resource availability, healthcare infrastructure, or cost implications for primary care providers. For instance, managing long term side effects, like lymphedema or cognitive impairment, may require resources or specialist referrals that are not accessible in all settings. Furthermore, there is no discussion of the financial burden of certain recommended interventions on either healthcare systems or patients, which is a significant gap.

Implementation Tools: The guideline does not provide supplementary tools such as checklists, care pathways, or decision aids that could support its use in clinical practice. These tools are especially important for primary care providers who may not be as familiar with the nuances of cancer survivorship care.

Monitoring and Audit: There is no mention of how healthcare providers could monitor adherence to the guidelines or audit their application in practice, which is a key aspect of ensuring their effectiveness in real-world settings.

Grade: 3/7

6. Editorial Independence

Disclosure of Conflicts of Interest: The guideline includes detailed disclosures of COI for all contributors

Funding Influence: The guideline explicitly states that no commercial entities influenced its content.

Grade: 6/7

Final Grade: 5.5/7

9. **Barnadas A, Garcia-Giralt N, Manso L, Ojeda B, Barnadas A, Margeli M, et al. SEOM Clinical Guideline on Survivorship in Breast Cancer (2017). Clin Transl Oncol. 2018 Jan;20(1):26–37.**

1. Scope and Purpose – 7/7

Clarity of Objectives:

The guideline sets out to support survivorship care for women with breast cancer, emphasizing shared follow-up between oncology and primary care, management of long-term toxicities, prevention of recurrence, and preservation of quality of life.

Health Questions:

Covers key survivorship domains, including cardiovascular health, endocrine sequelae, bone health, psychosocial support, sexual health, and risk-based follow-up strategies.

Target Population:

Explicitly targets adult female breast cancer survivors, particularly post-treatment individuals requiring coordinated survivorship care.

2. Stakeholder Involvement – 5/7

Multidisciplinary Development:

Developed by a group of experts from various disciplines including oncology, gynecology, cardiology, and general internal medicine—reflecting relevant expertise in breast cancer survivorship.

Target Users:

Clear focus on oncologists, general practitioners, and other clinicians involved in long-term follow-up.

Patient Involvement:

There is no documentation of direct patient or survivor involvement in the development process.

Limitation: No formal patient engagement noted.

3. Rigour of Development – 4/7

Evidence Base:

Draws on clinical guidelines from international bodies (e.g., ASCO, NICE), as well as supporting studies.

Transparency of Methodology:

Does not describe a systematic literature search, evidence grading system, or consensus process for formulating recommendations.

Updating Procedure:

No stated plans or mechanisms for future updates or revisions.

4. Clarity of Presentation – 6/7

Presentation of Recommendations:

Clearly organized into domains (e.g., endocrine effects, cardiovascular toxicity, bone health). Includes practical tables for follow-up stratification and symptom management.

Key Recommendations:

Easily identifiable and generally well-worded for clinical application.

5. Applicability – 5/7

Implementation Tools:

Presents conceptual frameworks for follow-up care and coordination, particularly for risk-adapted transitions between oncology and primary care.

Barriers and Costs:

Mentions practical challenges such as access to care and system-level variability, though not systematically addressed.

Monitoring and Audit:

Does not provide tools, metrics, or audit strategies for implementation monitoring.

6. Editorial Independence – 6/7

Conflict of Interest:

States that no external funding was received and no conflicts of interest declared by the authors.

Influence of Sponsorship:

Did not recieved funding

Overall Quality Rating: 5.5/7

**10. Loibl S, André F, Bachelot T, Barrios CH, Bergh J, Burstein HJ, Cardoso MJ, Carey LA, Dawood S, Del Mastro L, Denkert C, Fallenberg EM, Francis PA, Gamal-Eldin H, Gelmon K, Geyer CE, Gnant M, Guarneri V, Gupta S, Kim SB, Krug D, Martin M, Martin M,, Meattini I, Morrow M, Janni W, Paluch-Shimon S, Partridge A, Poortmans P, Pusztai L, Regan MM, Sparano J, Spanic T, Swain S, Tjulandin S, Toi M, Trapani D, Tutt A, Xu B, Curigliano G und Harbeck N;, „Early breast cancer: ESMO Clinical Practice Guideline for diagnosis, treatment and follow-up.,“ Ann Oncol, Bd. 35, Nr. 2, pp. 159-182, 2024.**

1. Scope and Purpose (Items 1–3)

Objective: The guideline aims to provide comprehensive, evidence-based recommendations for the diagnosis, treatment, and follow-up of early breast cancer.

Health Questions: It addresses numerous clinical questions across the patient pathway: diagnosis, staging, neoadjuvant/adjuvant therapy, surgery, radiation, and follow-up.

Target Population: Adult patients with early-stage breast cancer (localized disease, including subtypes such as HER2-positive, triple-negative, and hormone receptor-positive).

Score: 7/7

2. Stakeholder Involvement (Items 4–6)

Group Composition: A large, international, multidisciplinary panel including oncologists, radiologists, pathologists, surgeons, and methodologists.

Target Users: Oncologists, surgeons, radiologists, pathologists, and other health professionals involved in breast cancer care.

Patient Involvement: No direct reference to patient or public involvement in the guideline development process.

Score: 5/7

3. Rigor of Development (Items 7–14)

Systematic Methods: The guideline references data from phase III trials, meta-analyses, and ESMO-MCBS. Literature search strategy is not detailed.

Evidence Selection: Recommendations are based on high-level evidence and expert consensus; levels of evidence and grades of recommendation are provided.

Formulation of Recommendations: Clear clinical recommendations are developed and supported by the ESMO-Magnitude of Clinical Benefit Scale (MCBS).

External Review: The guideline is peer-reviewed by ESMO panels and published in a high-impact journal, although there is no explicit mention of public consultation.

Updating: No specific update policy or schedule is described.

Score: 5/7

4. Clarity of Presentation (Items 15–17)

Recommendations: Clear and specific for all aspects of care, structured by clinical setting and disease subtype.

Presentation: Uses tables, treatment algorithms, and flowcharts. Recommendations are presented in boxes for easy visibility.

Key Recommendations: Highly identifiable and linked to clinical context.

Score: 7/7

5. Applicability (Items 18–21)

Facilitators/Barriers: Acknowledges real-world limitations (e.g., access to targeted therapies, biomarkers) but doesn’t go into operational implementation detail.

Tools for Application: Clinical flowcharts and algorithms are included; however, implementation aids like checklists or audit criteria are missing.

Resource Implications: Limited discussion on cost-effectiveness or health system constraints across countries.

Monitoring/Auditing: No explicit metrics or frameworks for evaluating implementation success.

Score: 4/7

6. Editorial Independence (Items 22–23)

Funding Sources: Developed under the ESMO Guidelines Committee with no external commercial funding.

Competing Interests: Conflicts of interest for authors are disclosed in a dedicated section.

Score: 6/7

Funding and disclosures are transparent, but could provide more on how conflicts were managed.

Overall Quality Rating: 5.7/7

11. **Oldenburg J, Berney DM, Bokemeyer C, Climent MA, Daugaard G, Gietema JA, De Giorgi U, Haugnes HS, Huddart RA, Leão R, Sohaib A, Gillessen S und Powles , „Testicular seminoma and non-seminoma: ESMO-EURACAN Clinical Practice Guideline for diagnosis, treatment and follow-up,“ Ann Oncol, Bd. 33, Nr. 4, pp. 362-375, 2022.**

1. Scope and Purpose (Items 1–3)

Objective: The guideline provides evidence-based recommendations for the diagnosis, treatment, and follow-up of patients with testicular germ cell tumors (seminoma and non-seminoma).

Health Questions: Covers staging, initial management, chemotherapy, surgery, surveillance, and long-term follow-up.

Target Population: Adult patients diagnosed with testicular seminoma or non-seminoma.

Score: 7/7

2. Stakeholder Involvement (Items 4–6)

Group Composition: Authored by a multidisciplinary expert group including oncologists, urologists, radiologists, and pathologists.

Target Users: Specialists involved in testicular cancer care including oncologists, urologists, and general practitioners.

Patient Involvement: No direct mention of patient or public involvement in guideline development.

Score: 5/7

3. Rigor of Development (Items 7–14)

Systematic Methods: Utilizes evidence from randomized controlled trials, cohort studies, and systematic reviews.

Evidence Selection: Recommendations are supported by grading systems and clinical trial evidence, though detailed search methodology is not explicitly reported.

Formulation of Recommendations: Recommendations are structured by disease stage and subtype, with clear levels of evidence.

External Review: Developed under ESMO and EURACAN with standard peer-review, but no mention of external stakeholder or public review.

Updating: No specified timeline for updating the guideline.

Score: 5/7

4. Clarity of Presentation (Items 15–17)

Recommendations: Clearly presented, grouped by clinical stage and histological subtype.

Presentation: Includes tables and summaries that enhance accessibility and application in practice.

Key Recommendations: Clearly identifiable and actionable for clinical use.

Score: 7/7

5. Applicability (Items 18–21)

Facilitators/Barriers: Mentions variability in diagnostic and therapeutic access across regions but lacks actionable guidance.

Tools for Application: No formal tools (e.g., checklists or decision aids) are provided to facilitate clinical implementation.

Resource Implications: Limited discussion on economic/resource constraints, especially for low-resource settings.

Monitoring/Auditing: No mention of how to monitor adherence to the guideline or evaluate implementation success.

Score: 4/7

6. Editorial Independence (Items 22–23)

Funding Sources: Developed under the ESMO Guidelines Committee, no commercial sponsorship involved.

Competing Interests: Conflicts of interest disclosed, though management strategy not detailed.

Score: 6/7

Overall Quality Rating: 5.7/7

**12. Skolarus TA, Wolf AM, Erb NL, Brooks DD, Rivers BM, Underwood W 3rd, Salner AL, Zelefsky MJ, Aragon-Ching JB, Slovin SF, Wittmann DA, Hoyt MA, Sinibaldi VJ, Chodak G, Pratt-Chapman ML, Cowens-Alvarado RL. American Cancer Society prostate cancer survivorship care guidelines. CA Cancer J Clin. 2014 Jul-Aug;64(4):225-49.**

1. Scope and Purpose (Items 1–3)

Objective: The guideline focuses on optimizing survivorship care for prostate cancer survivors, including health promotion, surveillance, side-effect management, and care coordination.

Health Questions: Addresses surveillance for recurrence, management of treatment effects (e.g., incontinence, sexual dysfunction), and psychosocial health.

Target Population: Men with a history of prostate cancer who have completed primary treatment.

Score: 7/7

2. Stakeholder Involvement (Items 4–6)

Group Composition: A multidisciplinary panel, including oncologists, urologists, nurses, social workers, behavioral scientists, and survivorship experts.

Target Users: Primary care physicians, oncologists, and other providers involved in post-treatment care.

Patient Involvement: While patient needs and experiences inform the content, there’s no direct documentation of patient representatives participating in the development process.

Score: 6/7

3. Rigor of Development (Items 7–14)

Systematic Methods: Based on a literature review of studies from 1995 to 2012, including guidelines and expert consensus.

Evidence Selection: Limited in detail regarding inclusion/exclusion criteria or quality appraisal methods.

Formulation of Recommendations: Derived from expert consensus and available literature, categorized by survivorship domains.

External Review: Reviewed by ACS guideline committees and experts, though broader stakeholder consultation is not detailed.

Updating: States that ACS guidelines are reviewed every 5 years, or sooner if new evidence emerges.

Score: 5/7

Useful and consensus-driven, but less rigorous than other clinical guidelines in terms of methodology transparency.

4. Clarity of Presentation (Items 15–17)

Recommendations: Presented by care domain (e.g., surveillance, symptom management), with clear and specific guidance.

Presentation: Well-organized text with summary boxes and callouts for key recommendations.

Key Recommendations: Easily identifiable, structured logically for survivorship care pathways.

Score: 7/7

5. Applicability (Items 18–21)

Facilitators/Barriers: Addresses real-world survivorship challenges (e.g., fragmented care, lack of coordination).

Tools for Application: lacks in-depth tools (e.g., checklists, algorithms).

Resource Implications: Did not discuss resource or cost considerations.

Monitoring/Auditing: No specific framework for auditing or measuring implementation success.

Score: 3/7

6. Editorial Independence (Items 22–23)

Funding Sources: Sponsored by the American Cancer Society.

Competing Interests: Conflicts of interest disclosed; no evidence of commercial bias.

Score: 6/7

Overall Quality Rating: 5.7/7

13. **Dingemans AC, Früh M, Ardizzoni A, Faivre-Finn C, Hendriks LE, Lantuejoul S, Peters S, Reguart N, Rudin CM, De Ruysscher D, Van Schil PE, Vansteenkiste J und Reck M, „Small-cell lung cancer: ESMO Clinical Practice Guidelines for diagnosis, treatment and follow-up,“ Ann Oncol, Bd. 32, Nr. 7, pp. 839-853, 2021.**

1. Scope and Purpose (Items 1–3)

Objective: To provide evidence-based guidance for diagnosis, staging, treatment (limited and extensive stage), and follow-up of small-cell lung cancer (SCLC).

Health Questions: Covers clinical questions about staging methods, chemotherapy, radiotherapy, immunotherapy, surgery (in selected patients), and surveillance protocols.

Target Population: Adult patients diagnosed with limited-stage or extensive-stage SCLC.

Score: 7/7

2. Stakeholder Involvement (Items 4–6)

Group Composition: Developed by an international panel of multidisciplinary experts including medical oncologists, radiation oncologists, pulmonologists, and pathologists.

Target Users: Oncologists, pulmonologists, radiologists, and other clinicians involved in SCLC care.

Patient Involvement: No documented participation of patient representatives in the development process.

Score: 5/7

3. Rigor of Development (Items 7–14)

Systematic Methods: Based on literature review and clinical trial evidence, supported by levels of evidence and recommendation grading.

Evidence Selection: Evidence derived from key randomized controlled trials and meta-analyses; specific inclusion criteria are not deeply detailed.

Formulation of Recommendations: Recommendations are stratified by disease stage and treatment setting with evidence levels.

External Review: Peer-reviewed through ESMO’s internal processes, but no details on wider stakeholder/public review.

Updating: No fixed update

Score: 5/7

4. Clarity of Presentation (Items 15–17)

Recommendations: Clearly stated and stratified by treatment phase and disease extent (limited vs. extensive).

Presentation: Organized into thematic sections with boxed recommendations and summary tables.

Key Recommendations: Distinct and easy to identify.

Score: 7/7

5. Applicability (Items 18–21)

Facilitators/Barriers: Notes variation in treatment access globally and between healthcare settings, but doesn't explore strategies to address these barriers.

Tools for Application: No specific clinical tools (e.g., decision aids, flowcharts) are provided.

Resource Implications: Briefly mentions the need for multidisciplinary teams but lacks cost/resource analysis.

Monitoring/Auditing: No metrics or guidance for monitoring implementation are offered.

Score: 4/7

6. Editorial Independence (Items 22–23)

Funding Sources: Produced by ESMO with no commercial funding or sponsorship noted.

Competing Interests: Conflicts of interest are disclosed by all contributors.

Score: 6/7

Overall Quality Rating: 5.7/7
